# Supplementary material
Source: publisher site journal article supplement (https://www.dovepress.com/article/402548)
Supplement: Supplementary file 1 [file get_supplementary_file.php]

**Appendicular skeletal muscle mass and sarcopenia as a new predictor of poor functional outcomes in ischemic stroke**

**Supplementary Table. Univariable and multivariable analyses for 3-month mortality**

|  | Crude OR (95% CI) | *P* value | Adjusted OR (95% CI)a | *P*-value |
| --- | --- | --- | --- | --- |
| Height-adjusted ASM per 1 increase | 0.33 (0.16–0.66) | 0.002 | - | - |
| Height-adjusted ASM category |  | 0.070 | - | - |
| Q1 | Reference |  | Reference |  |
| Q2 | 0 (0,-) | 0.996 | - | - |
| Q3 | 1 (0.06–16.13) | 1.000 | - | - |
| Q4 | 8.31 (1.03–67.20) | 0.047 | - | - |
| Sarcopenia per EWGS | 3.14 (0.88–11.24) | 0.079 | - | - |
| Sarcopenia per AWGS | 4.24 (1.18–15.21) | 0.027 | - | - |

Q1 implied the highest value of height-adjusted ASM and Q4 implied the lowest value. Multivariable models were adjusted for covariates in univariate analyses (*P* <0.05) and were performed using the backward elimination method. aAdjusted for age, sex, BMI, WBC, Hb, hs-CRP, TG, eGFR, homocysteine, NIHSS, DM, AF, discharge statins, discharge antiplatelet agents, discharge anticoagulants, TOAST classification, symptomatic ICH, in-hospital infection, and time from admission to DEXA scan.

Abbreviations: OR, odds ratio; CI, confidence interval; ASM, appendicular skeletal muscle mass; EWGS, European Working Group for Sarcopenia; AWGS, Asian Working Group for Sarcopenia; BMI, body mass index; WBC, white blood cells; AF, atrial fibrillation; DM, diabetes mellitus; DEXA, dual-energy absorptiometry; hs-CRP, C-reactive protein; TG, triglyceride; eGFR, estimated glomerular filtration rate; Hb, hemoglobin; NIHSS, National Institutes of Health Stroke Scale; ICH, intracerebral hemorrhage; TOAST, Trial of ORG 10172 in Acute Stroke Treatment**.**

.
